# Supplementary material for: Core cross-linked micelles of polyphosphoester containing amphiphilic block copolymers as drug nanocarriers
Source: Royal Society of Chemistry journal article supplement (doi:10.1039/c6ra07422g), 2016-01-01
Supplement: c6ra07422g1.pdf [file c6ra07422g1.pdf]

## Supporting Information

### Core Cross-Linked Micelles of Polyphosphoester-Containing Amphiphilic Block Copolymers as Drug Nanocarriers

Z. Ergul Yilmaz,<sup>ab</sup> S. Vanslambrouck,<sup>a</sup> S. Cajot,<sup>a</sup> J. Thiry,<sup>a</sup> A. Debuigne,<sup>a</sup> P. Lecomte,<sup>a</sup>  
C. Jerome<sup>\*ab</sup> and R. Riva<sup>a</sup>

<sup>a</sup>Center for Education and Research on Macromolecules (CERM), University of Liège (ULg), Chemistry  
Department, Sart Tilman, Building B6a-third floor, Liège, B-4000, Belgium

<sup>b</sup>INSERM U1066, Micro et Nanomédecines Biomimétiques, IBS, University of Angers, 4 rue Larrey,  
Cedex 9, Angers, 49933, France

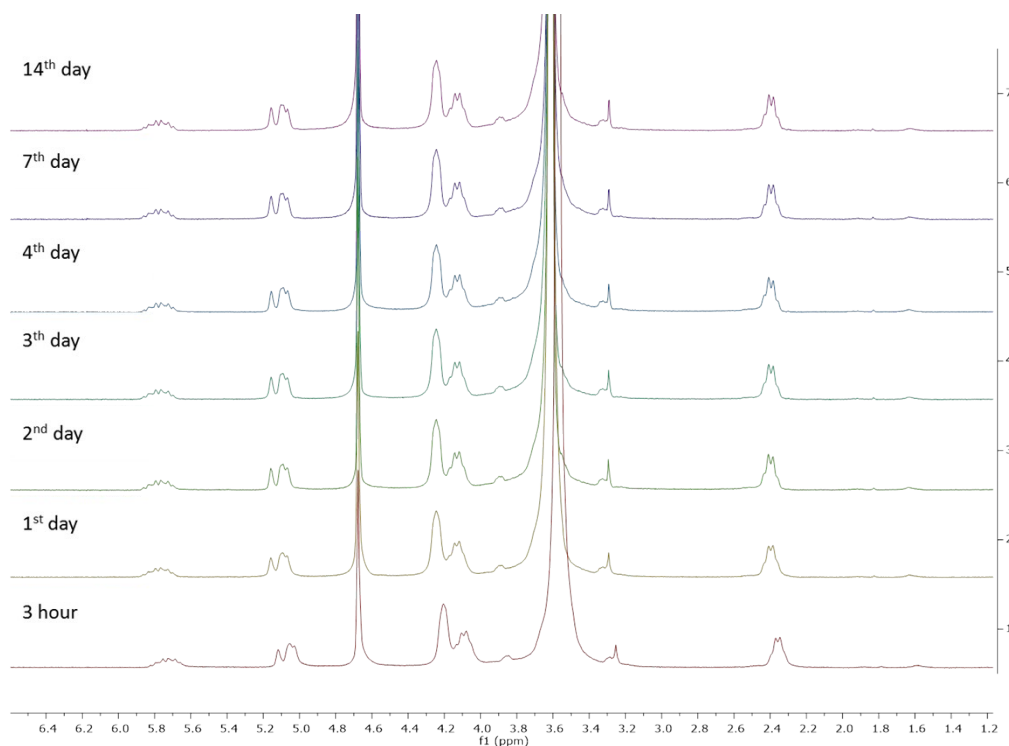

**Figure S1.** <sup>1</sup>H NMR spectrum in D<sub>2</sub>O of PEO<sub>110</sub>-*b*-polyBP<sub>7</sub> copolymer kept in water over several days.

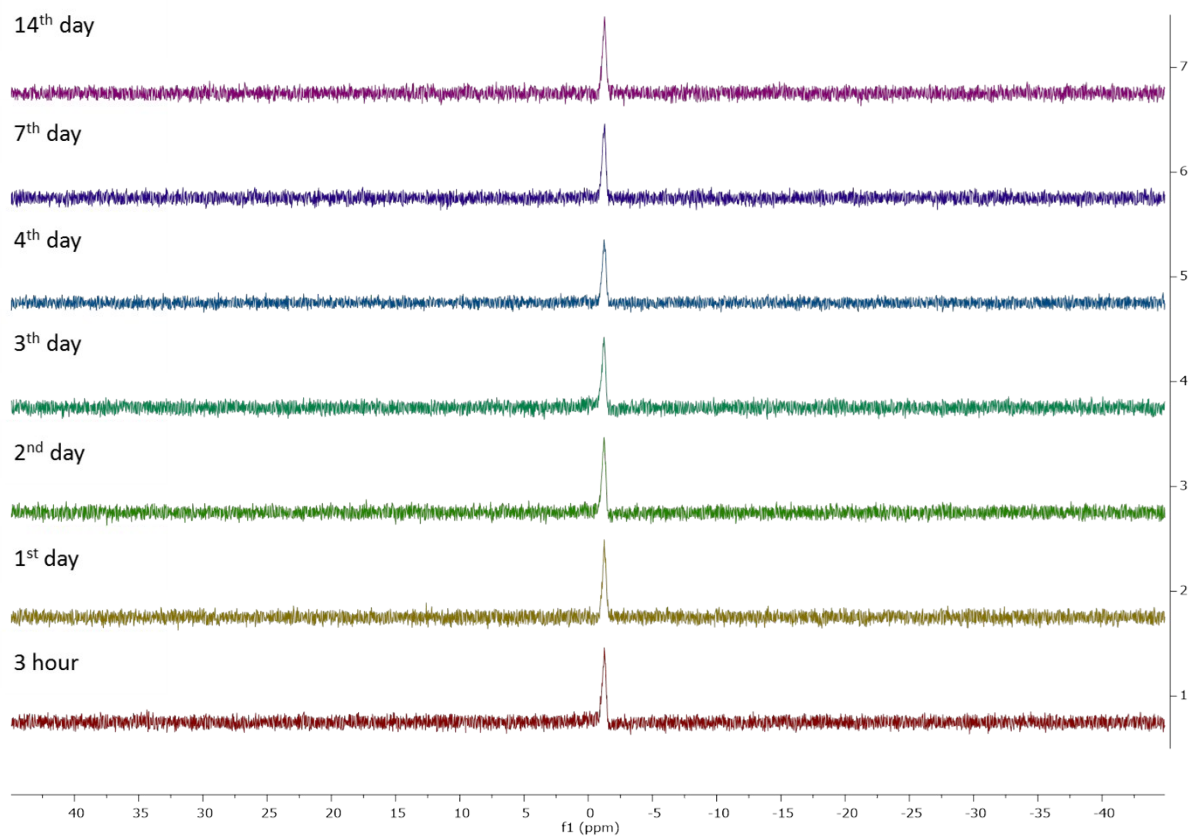

**Figure S2.**  $^{31}\text{P}$  NMR spectrum in  $\text{D}_2\text{O}$  of  $\text{PEO}_{110}$ -*b*-polyBP<sub>7</sub> copolymer kept in water over several days.
